# Supplementary material
Source: HighWire-hosted journal article supplement (https://www.annfammed.org/highwire/filestream/8481/field_highwire_adjunct_files/0/Manthey_Supp_App_1-4.pdf)
Supplement: Manthey_Supp_App_1-4.pdf [file Manthey_Supp_App_1-4.pdf]

### **Supplementary materials for:**

Rehm J, Allamani A, Della Vedova R, Elekes Z, Jakubczyk A, Landsmane I, Manthey J, Moreno-España J, Pieper L, Probst C, Snikere S, Struzzo P, Voller F, Wittchen H, Gual A, Wojnar M. General practitioners recognizing alcohol dependence: a large cross-sectional study in 6 European countries. *Ann Fam Med*. 2015;13(1):28-32.

## Web Appendices:

### Web Appendix 1

#### Detailed listing of sampling procedure by country

|                                   | Germany                                                                       | Hungary                                                               | Italy 1 -<br>Friuli-Venezia<br>Giulia            | Italy 2 - Tuscany                          | Latvia                                                                                  | Poland                                                       | Spain                                          |
|-----------------------------------|-------------------------------------------------------------------------------|-----------------------------------------------------------------------|--------------------------------------------------|--------------------------------------------|-----------------------------------------------------------------------------------------|--------------------------------------------------------------|------------------------------------------------|
| Number of GP assessments          | 2.304                                                                         | 2.308                                                                 | 1.149                                            | 1.005                                      | 2.468                                                                                   | 2.396                                                        | 1.373                                          |
| Number of interviewed patients    | 1.356                                                                         | 2.306                                                                 | 492                                              | 451                                        | 1.302                                                                                   | 1.197                                                        | 1994                                           |
| <b>GP Selection</b>               |                                                                               |                                                                       |                                                  |                                            |                                                                                         |                                                              |                                                |
| Source of GP practices            | from complete register                                                        | from complete register                                                | from previous research                           | from a local large GP association          | from complete register                                                                  | from complete register                                       | from complete register                         |
| Procedure of selecting PC Centers | contacted all registered GPs in selected regions                              | selection of GPs nationwide: stratified by population for each region | contacted GPs that expressed interest previously | all GPs in this association were contacted | selection of GPs nationwide: stratified by region, urbanization and size of GP practice | randomly contacted; refusals replaced by next GP in register | randomly contacted; refusals replaced randomly |
| Represented regions               | Saxony and Berlin (federal states), Potsdam and Potsdam-Mittelmark (counties) | Hungary                                                               | Friuli-Venezia Giulia (federal state)            | Tuscany (federal state)                    | Latvia                                                                                  | Podkarpackie and Lodzkie (federal state)                     | Catalonia (autonomous community)               |
| Population size of regions        | 7,817,000                                                                     | 9,957,731                                                             | 1,221,860                                        | 3,692,202                                  | 2,023,825                                                                               | 4,654,602                                                    | 7,553,650                                      |
| Number of Centers contacted       | 207                                                                           | 60                                                                    | 90                                               | 120                                        | 238                                                                                     | 103                                                          | 30                                             |
| Number of Centers refused         | 121                                                                           | 10                                                                    | 60                                               | 95                                         | 133                                                                                     | 54                                                           | 5                                              |
| Number of Centers included        | 76                                                                            | 50                                                                    | 30                                               | 25                                         | 105                                                                                     | 49                                                           | 23                                             |

|                                                                                                                                                                                                                                                                                                                                                                                                                                                                                                                                                                                                                    |                                        |                             |                                                                                                                                                      |                                                                                             |                                                                                             |                                                                                                                                     |                                                                     |
|--------------------------------------------------------------------------------------------------------------------------------------------------------------------------------------------------------------------------------------------------------------------------------------------------------------------------------------------------------------------------------------------------------------------------------------------------------------------------------------------------------------------------------------------------------------------------------------------------------------------|----------------------------------------|-----------------------------|------------------------------------------------------------------------------------------------------------------------------------------------------|---------------------------------------------------------------------------------------------|---------------------------------------------------------------------------------------------|-------------------------------------------------------------------------------------------------------------------------------------|---------------------------------------------------------------------|
| Main determinants of patients selection for GP assessment and interview were health care system and logistic capacities. First, GP assessments before the day of medical visit could not be done in most regions because the majority of patients appeared spontaneously without prior appointment. Second, interviews had to be conducted on the same day of medical visit in some regions out of logistic reasons. These conditions inhibited stratified sampling of patients and has led to different sampling strategies of the interviewees across the regions. Details of the strategies can be found below: |                                        |                             |                                                                                                                                                      |                                                                                             |                                                                                             |                                                                                                                                     |                                                                     |
| <b>Patient Selection</b>                                                                                                                                                                                                                                                                                                                                                                                                                                                                                                                                                                                           |                                        |                             |                                                                                                                                                      |                                                                                             |                                                                                             |                                                                                                                                     |                                                                     |
| Selecting patients for GP assessment; prerequisite in all countries: meeting eligibility criteria                                                                                                                                                                                                                                                                                                                                                                                                                                                                                                                  | all patients on a given day            | all patients on a given day | 40 patients per GP; assessment conducted as interview                                                                                                | all patients on a given day                                                                 | all patients on a given day                                                                 | all patients on a given day                                                                                                         | all patients on a given day                                         |
| Procedure of selecting patients for interview; prerequisite in all countries: meeting eligibility criteria and providing consent                                                                                                                                                                                                                                                                                                                                                                                                                                                                                   | all patients providing contact details | all patients                | 17 patients per GP, stratified by sex and age:<br>1) patients with alcohol dependence;<br>2) risky drinkers;<br>3) normal drinkers;<br>4) abstainers | 1) all patients with alcohol problems as assessed by GP;<br>2) sample of general population | 1) all patients with alcohol problems as assessed by GP;<br>2) sample of general population | 1) all patients currently in treatment for AD with GP;<br>2) all patients with alcohol problems;<br>3) random subsample of the rest | all patients                                                        |
| Number of patients contacted for interview                                                                                                                                                                                                                                                                                                                                                                                                                                                                                                                                                                         | 1792                                   | 2608                        | 542                                                                                                                                                  | 539                                                                                         | 1470                                                                                        | 1482                                                                                                                                | 2645                                                                |
| Number of patients refused                                                                                                                                                                                                                                                                                                                                                                                                                                                                                                                                                                                         | 432                                    | 300                         | 50                                                                                                                                                   | 87                                                                                          | 168                                                                                         | 285                                                                                                                                 | 650                                                                 |
| <b>Data Collection Characteristics</b>                                                                                                                                                                                                                                                                                                                                                                                                                                                                                                                                                                             |                                        |                             |                                                                                                                                                      |                                                                                             |                                                                                             |                                                                                                                                     |                                                                     |
| GP assessment                                                                                                                                                                                                                                                                                                                                                                                                                                                                                                                                                                                                      | after consultation                     | after consultation          | as interview during consultation                                                                                                                     | during or after consultation                                                                | before or after consultation                                                                | after consultation                                                                                                                  | after consultation                                                  |
| Spontaneous patients                                                                                                                                                                                                                                                                                                                                                                                                                                                                                                                                                                                               | included                               | included                    | included                                                                                                                                             | included                                                                                    | included                                                                                    | excluded                                                                                                                            | included                                                            |
| First-time patients                                                                                                                                                                                                                                                                                                                                                                                                                                                                                                                                                                                                | included                               | included                    | included                                                                                                                                             | included                                                                                    | excluded                                                                                    | excluded                                                                                                                            | included                                                            |
| Other Exclusion criteria                                                                                                                                                                                                                                                                                                                                                                                                                                                                                                                                                                                           | none                                   | none                        | severe mental impairment that may hinder comprehension of questions                                                                                  | severe mental impairment that may hinder comprehension of questions                         | severe mental impairment that may hinder comprehension of questions                         | only patients for full consultation included                                                                                        | severe mental impairment that may hinder comprehension of questions |

Qualification of  
interviewer

trained students

trained  
interviewers

trained GPs

trained  
psychologists and  
statisticians

trained interviewers

trained  
interviewers

trained  
sociologists

---

## Web Appendix 2

### List of questionnaire items used by general practitioners for patient assessment

| Section                                  | Content                                                                                                                                                                                                                                                                                                                                                                                                                                                                     | Sample items                                                                                                                                                                                                                                                               |
|------------------------------------------|-----------------------------------------------------------------------------------------------------------------------------------------------------------------------------------------------------------------------------------------------------------------------------------------------------------------------------------------------------------------------------------------------------------------------------------------------------------------------------|----------------------------------------------------------------------------------------------------------------------------------------------------------------------------------------------------------------------------------------------------------------------------|
| <b>General</b>                           |                                                                                                                                                                                                                                                                                                                                                                                                                                                                             |                                                                                                                                                                                                                                                                            |
| Socio-demographics                       | Age, sex, ethnicity                                                                                                                                                                                                                                                                                                                                                                                                                                                         | Sex of the patient: <ul style="list-style-type: none"> <li>○ male</li> <li>○ female</li> </ul>                                                                                                                                                                             |
| General health                           | Height, weight, blood pressure (systolic/diastolic), smoking                                                                                                                                                                                                                                                                                                                                                                                                                | Smoking: <ul style="list-style-type: none"> <li>○ yes, cigarettes/day: _ _</li> <li>○ no, not in _ _ years</li> <li>○ never</li> </ul>                                                                                                                                     |
| Main health problems                     | High blood pressure, diabetes, high cholesterol, coronary heart diseases, cancer, liver diseases, pain, respiratory diseases, viral infections, gastrointestinal diseases, arthrosis, depression, anxiety disorders, adiposity, migraine, sleeping disorder, other                                                                                                                                                                                                          | Please check all boxes that apply: <ul style="list-style-type: none"> <li>○ high blood pressure</li> <li>○ diabetes</li> <li>○ high cholesterol</li> </ul>                                                                                                                 |
| Cause for consultation                   | Check-up/laboratory, acute illness, prevention, chronic illness, referral, other                                                                                                                                                                                                                                                                                                                                                                                            | Please check all boxes that apply: <ul style="list-style-type: none"> <li>○ check-up/laboratory</li> <li>○ acute illness</li> </ul>                                                                                                                                        |
| <b>Alcohol Use Section</b>               |                                                                                                                                                                                                                                                                                                                                                                                                                                                                             |                                                                                                                                                                                                                                                                            |
| Alcohol use, problems and clinical signs | Current alcohol use, problems with alcohol and clinical signs for AUD: breath smelling of alcohol, red eyes, elevated liver enzymes, enlarged liver, unspecific pain in the upper abdomen, morning nausea or vomiting, malnutrition, weight loss, premature aging, puffy or red face, increased sweating, red palms, history of epileptic seizures, tremor, unsteady gait, increased frequency of small accidents, bloated stomach, enlarged abdomen, muscle atrophy, other | Are there clinical signs for an AUD? <ul style="list-style-type: none"> <li>○ no</li> <li>○ yes <ul style="list-style-type: none"> <li>○ breath smelling of alcohol</li> <li>○ red eyes</li> <li>○ elevated liver enzymes</li> <li>○ enlarged liver</li> </ul> </li> </ul> |
| AUD Diagnoses                            | Current diagnoses <ul style="list-style-type: none"> <li>○ alcohol dependence</li> <li>○ alcohol abuse</li> </ul> Lifetime diagnoses: <ul style="list-style-type: none"> <li>○ alcohol dependence</li> <li>○ alcohol abuse</li> </ul>                                                                                                                                                                                                                                       | Do you believe your patient would be diagnosed with alcohol dependence? <ul style="list-style-type: none"> <li>○ no</li> <li>○ yes</li> </ul>                                                                                                                              |
| Treatment for AUD                        | Currently in treatment for AUD: <ul style="list-style-type: none"> <li>○ type of treatment</li> </ul>                                                                                                                                                                                                                                                                                                                                                                       | Do you know which treatment the patient is receiving?                                                                                                                                                                                                                      |

- location of treatment
  - reasons for no treatment
- lifetime treatment for AUD (no/yes)

- psychosocial treatment
- pharmacological treatment (specify)
- psychosocial and pharmacological treatment

---

*Notes.* AUD = Alcohol Use Disorder

## Web Appendix 3

### Sample characteristics by data source and sex

|                                                   | Patients assessed by GP |                       |                       | CIDI interview <sup>a</sup> |                       |                       |
|---------------------------------------------------|-------------------------|-----------------------|-----------------------|-----------------------------|-----------------------|-----------------------|
|                                                   | Male<br>(N=5,461)       | Female<br>(N=7,542)   | Total<br>(N=13,003)   | Male<br>(N=3,715)           | Female<br>(N=5,383)   | Total<br>(N=9,098)    |
| <b>Age Category % (CI)</b>                        |                         |                       |                       |                             |                       |                       |
| 18 – 29                                           | 18.0<br>(17.0 - 19.0)   | 16.8<br>(16.0 - 17.7) | 17.3<br>(16.7 - 18.0) | 18.1<br>(16.8 - 19.3)       | 17.2<br>(16.2 - 18.2) | 17.5<br>(16.7 - 18.3) |
| 30 – 39                                           | 18.0<br>(17.0 - 19.0)   | 18.3<br>(17.4 - 19.2) | 18.2<br>(17.5 - 18.8) | 18.9<br>(17.6 - 20.1)       | 19.2<br>(18.1 - 20.3) | 19.1<br>(18.3 - 19.9) |
| 40 – 49                                           | 21.6<br>(20.5 - 22.7)   | 22.8<br>(21.9 - 23.8) | 22.3<br>(21.6 - 23.0) | 21.9<br>(20.5 - 23.2)       | 22.2<br>(21.1 - 23.3) | 22.1<br>(21.2 - 22.9) |
| 50 – 64                                           | 42.4<br>(41.1 - 43.7)   | 42.0<br>(40.9 - 43.1) | 42.2<br>(41.3 - 43.0) | 41.2<br>(39.6 - 42.8)       | 41.4<br>(40.1 - 42.8) | 41.3<br>(40.3 - 42.3) |
| <b>Age mean (SD)</b>                              | 44.5 (13.4)             | 44.6 (13.0)           | 44.5 (13.2)           | 44.2 (13.6)                 | 44.3 (13.1)           | 44.3 (13.3)           |
| <b>Married or cohabiting % (CI)</b>               | NA                      | NA                    | NA                    | 64.7<br>(63.2 - 66.3)       | 64.2<br>(62.8 - 65.5) | 64.4<br>(63.4 - 65.4) |
| <b>Employed % (CI)</b>                            | NA                      | NA                    | NA                    | 65.7<br>(64.2 - 67.3)       | 59.8<br>(58.5 - 61.1) | 62.2<br>(61.2 - 63.2) |
| <b>Unemployed % (CI)</b>                          | NA                      | NA                    | NA                    | 13.4<br>(12.3 - 14.5)       | 13.3<br>(12.4 - 14.2) | 13.3<br>(12.6 - 14.0) |
| <b>SES – self classified % (CI)</b>               |                         |                       |                       |                             |                       |                       |
| Above average                                     | NA                      | NA                    | NA                    | 8.2<br>(7.3 - 9.2)          | 6.6<br>(5.9 - 7.2)    | 7.2<br>(6.7 - 7.8)    |
| Average                                           | NA                      | NA                    | NA                    | 69.4<br>(67.9 - 70.9)       | 71.2<br>(70.0 - 72.4) | 70.5<br>(69.5 - 71.4) |
| Below average                                     | NA                      | NA                    | NA                    | 22.4<br>(21.0 - 23.7)       | 22.3<br>(21.1 - 23.4) | 22.3<br>(21.4 - 23.2) |
| <b>Education in years mean (SD)</b>               | NA                      | NA                    | NA                    | 12.6 (3.6)                  | 12.8 (3.6)            | 12.7 (3.6)            |
| <b>BMI (GP only <sup>b</sup>) mean (SD)</b>       | 26.6 (4.6)              | 25.8 (5.6)            | 26.2 (5.2)            | 26.7 (4.7)                  | 25.9 (5.6)            | 26.3 (5.3)            |
| <b>Hypertension (GP only <sup>b</sup>) % (CI)</b> | 30.9<br>(29.7 - 32.1)   | 24.6<br>(23.7 - 25.6) | 27.3<br>(26.5 - 28.0) | 27.6<br>(26.1 - 29.0)       | 21.9<br>(20.8 - 23.0) | 24.2<br>(23.3 - 25.0) |

**WHODAS 2.0** Number of days of inability to carry out usual activities or work due to health condition % (CI)

|                                                                         |                       |                       |                       |                       |                       |                       |
|-------------------------------------------------------------------------|-----------------------|-----------------------|-----------------------|-----------------------|-----------------------|-----------------------|
|                                                                         | NA                    | NA                    | NA                    | 1·6<br>(1·4 - 1·7)    | 1·5<br>(1·3 - 1·6)    | 1·5<br>(1·4 - 1·6)    |
| <b>Severe distress % (CI)</b>                                           |                       |                       |                       |                       |                       |                       |
| Depression or anxiety (GP <sup>b</sup> )                                | 12·4<br>(11·5 - 13·3) | 16·4<br>(15·5 - 17·2) | 14·7<br>(14·1 - 15·3) | 11·9<br>(10·8 - 13·0) | 16·0<br>(15·0 - 17·0) | 14·4<br>(13·6 - 15·1) |
| Mental distress assessed by K10 (self <sup>b</sup> )                    | NA                    | NA                    | NA                    | 5·2<br>(4·5 - 6·0)    | 6·4<br>(5·7 - 7·0)    | 5·9<br>(5·4 - 6·4)    |
| <b>Alcohol use last 12 months</b><br>(GP and self <sup>b</sup> ) % (CI) | 66·2<br>(64·9 - 67·6) | 46·9<br>(45·7 - 48·1) | 55·1<br>(54·2 - 56·0) | 78·9<br>(77·5 - 80·2) | 54·8<br>(53·4 - 56·1) | 64·4<br>(63·4 - 65·4) |
| <b>Currently smoking</b><br>(GP and self <sup>b</sup> ) % (CI)          | 38·6<br>(37·3 - 39·9) | 26·0<br>(24·9 - 27·0) | 31·3<br>(30·5 - 32·1) | 38·5<br>(36·9 - 40·1) | 27·1<br>(25·9 - 28·3) | 31·7<br>(30·7 - 32·7) |

*Notes.* CI = 95% confidence interval based on standard error. SD = standard deviation. NA = not applicable because this information has not been assessed by general practitioner. SES = socioeconomic status. BMI = Body-Mass-Index. WHODAS 2.0 = World Health Organization Disability Assessment Schedule 2. K10 = Kessler Psychological Distress Scale; cutoff for severe mental distress was 21 points in a total score range from 0 – 40.

<sup>a</sup> Data was weighted with inverse sampling probabilities.

<sup>b</sup> Data was derived from different sources: ‘GP’ indicates that the general practitioner has provided the answer while ‘self’ indicates that the information derives from the interviewed patient him/herself. ‘GP and self’ means that both sources of information were used for the respective sample, i.e. the ‘GP’ response is displayed for the sample assessed by the GP and the ‘self’ response is displayed for the interviewed sample.



## Web Appendix 4

### Logistic regression and multinomial logistic regression on diagnostic classes of alcohol dependence

|                                                                       | OR (95% CI), p-value                                      |                                                           | RRR (95% CI), p-value                                                                    |                                 |                                     |
|-----------------------------------------------------------------------|-----------------------------------------------------------|-----------------------------------------------------------|------------------------------------------------------------------------------------------|---------------------------------|-------------------------------------|
|                                                                       | Model 1:<br>GP diagnosis vs.<br>remaining AD<br>diagnoses | Model 2:<br>GP diagnosis vs.<br>remaining AD<br>diagnoses | Model 3 (multinomial logistic regression):<br>No AD diagnosis (base) vs. AD diagnosis by |                                 |                                     |
|                                                                       |                                                           |                                                           | only GP                                                                                  | only CIDI                       | GP & CIDI                           |
| Logistic regression (different models) with<br>predictors as follows: | N=622                                                     | N=619                                                     | N=6,728                                                                                  |                                 |                                     |
| Sex                                                                   | 0.77 (0.49 - 1.21),<br>.260                               | 0.69 (0.43 - 1.13),<br>.142                               | 0.43 (0.31 - 0.58),<br>< .0001*                                                          | 0.42 (0.31 - 0.58),<br>< .0001* | 0.22 (0.13 - 0.37),<br>< .0001      |
| Age                                                                   | 1.07 (1.05 - 1.09),<br>< .0001°                           | 1.06 (1.04 - 1.08),<br>< .0001°                           | 1.02 (1.01 - 1.04),<br>.0005*                                                            | 0.97 (0.95 - 0.98),<br>< .0001* | 1.02 (1.00 - 1.04),<br>.041         |
| Unemployment                                                          | 3.62 (2.12 - 6.04),<br>< .0001°                           | 3.44 (1.90 - 6.21),<br>< .0001°                           | 3.47 (2.52 - 4.78),<br>< .0001*                                                          | 1.21 (0.81 - 1.81),<br>.351     | 3.27 (1.97 - 5.42),<br>< .0001      |
| Socioeconomic status below average<br>(self-reported)                 | 1.06 (0.67 - 1.67),<br>.804                               | 0.92 (0.53 - 1.59),<br>.765                               | 1.50 (1.11 - 2.04),<br>.0081                                                             | 1.25 (0.90 - 1.73),<br>.182     | 1.48 (0.91 - 2.41),<br>.111         |
| Number of years spent in education                                    | 0.87 (0.81 - 0.93),<br>< .0001°                           | 0.87 (0.81 - 0.95),<br>.0009°                             | 0.95 (0.91 - 0.99),<br>.012                                                              | 1.05 (1.01 - 1.09),<br>.011     | 0.95 (0.89 - 1.02),<br>.148         |
| WHODAS sum score                                                      | 1.01 (0.99 - 1.02),<br>.460                               | 1.00 (0.98 - 1.03),<br>.947                               | 1.00 (0.99 - 1.01),<br>.737                                                              | 1.01 (0.99 - 1.02),<br>.343     | 1.01 (0.99 - 1.02),<br>.255         |
| K10 sum score                                                         | 0.98 (0.95 - 1.01),<br>.147                               | 1.00 (0.96 - 1.05),<br>.819                               | 1.02 (1.00 - 1.05),<br>.071                                                              | 1.07 (1.04 - 1.09),<br>< .0001* | 1.07 (1.04 - 1.11),<br>< .0001      |
| Daily amount of ethanol intake in g                                   | 1.00 (0.99 - 1.00),<br>.780                               | 1.01 (1.00 - 1.01),<br>.124                               | 1.03 (1.03 - 1.04),<br>< .0001*                                                          | 1.04 (1.03 - 1.04),<br>< .0001* | 1.04 (1.03 - 1.05),<br>< .0001      |
| Number of days with at least 60g of<br>ethanol                        | 1.03 (0.98 - 1.08),<br>.285                               | 1.06 (0.98 - 1.14),<br>.122                               | 1.08 (1.02 - 1.15),<br>.007                                                              | 1.08 (1.02 - 1.14),<br>.0066    | 1.09 (1.02 - 1.16),<br>.0073        |
| Hypertension (assessed by GP)                                         | 2.35 (1.42 - 3.87),<br>.0009°                             | 1.76 (1.03 - 2.99),<br>.040                               | 1.58 (1.16 - 2.16),<br>.0039                                                             | 0.73 (0.48 - 1.11),<br>.143     | 1.23 (0.77 - 1.97),<br>.373         |
| Liver problems (assessed by GP)                                       | 20.31 (5.45 -<br>75.75),<br>< .0001°                      | 29.73 (6.49 -<br>136.31),<br>< .0001°                     | 10.20 (6.54 - 15.92),<br>< .0001*                                                        | 0.61 (0.19 - 1.97),<br>.411     | 10.45 (5.74 -<br>19.03),<br>< .0001 |

|                                                                             |                             |                                 |                             |                               |                              |
|-----------------------------------------------------------------------------|-----------------------------|---------------------------------|-----------------------------|-------------------------------|------------------------------|
| Anxiety (assessed by GP)                                                    | 0.77 (0.48 - 1.25),<br>.291 | 0.83 (0.47 - 1.46),<br>.520     | 1.38 (0.92 - 2.07),<br>.124 | 1.92 (1.29 - 2.86),<br>.0013* | 2.40 (1.34 - 4.30),<br>.0031 |
| Depression (assessed by GP)                                                 | 1.04 (0.52 - 2.07),<br>.941 | 1.36 (0.62 - 2.97),<br>.444     | 1.23 (0.75 - 2.04),<br>.413 | 0.92 (0.53 - 1.61),<br>.780   | 1.32 (0.70 - 2.47),<br>.387  |
| DSM-V criterion 1 (AD)<br>Alcohol is taken longer or more                   | -                           | 0.38 (0.21 - 0.68),<br>.0013°   | -                           | -                             | -                            |
| DSM-V criterion 2 (AD)<br>Desire to cut down or control AU                  | -                           | 0.21 (0.12 - 0.36),<br>< .0001° | -                           | -                             | -                            |
| DSM-V criterion 3 (AD)<br>A lot of time spent on effects of AU              | -                           | 0.36 (0.18 - 0.75),<br>.0062    | -                           | -                             | -                            |
| DSM-V criterion 4 (new AUD)<br>Craving                                      | -                           | 1.69 (0.73 - 3.91),<br>.220     | -                           | -                             | -                            |
| DSM-V criterion 5 (AA)<br>Failure to meet role obligations                  | -                           | 0.78 (0.39 - 1.54),<br>.467     | -                           | -                             | -                            |
| DSM-V criterion 6 (AA)<br>Not quitting use despite social problems          | -                           | 5.53 (1.87 - 16.38),<br>.0021°  | -                           | -                             | -                            |
| DSM-V criterion 7 (AD)<br>Reduced/given up activities                       | -                           | 0.72 (0.28 - 1.84),<br>.492     | -                           | -                             | -                            |
| DSM-V criterion 8 (AA)<br>AU in hazardous situations                        | -                           | 0.39 (0.18 - 0.84),<br>.016     | -                           | -                             | -                            |
| DSM-V criterion 9 (AD)<br>Continued AU despite physical/psychol.<br>problem | -                           | 0.80 (0.37 - 1.71),<br>.565     | -                           | -                             | -                            |
| DSM-V criterion 10 (AD)<br>Tolerance                                        | -                           | 0.79 (0.39 - 1.60),<br>.508     | -                           | -                             | -                            |
| DSM-V criterion 11 (AD)<br>Withdrawal                                       | -                           | 0.81 (0.33 - 1.97),<br>.646     | -                           | -                             | -                            |
